# Supplementary material
Source: publisher figshare collection journal article supplement (https://acs.figshare.com/ndownloader/files/4735909)
Supplement: Supplementary file 1 [file 4735909]

# Supporting Information

## Solvent-Responsive Metalloporphyrins: Binding and Catalysis

Yibo Zhou, Eui-Hyun Ryu, Yan Zhao\*, and L. Keith Woo\*

*Department of Chemistry, Iowa State University, Ames, Iowa 50011-3111*

### Table of Contents

|                                              |    |
|----------------------------------------------|----|
| Synthesis of compounds <b>3</b> and <b>4</b> | S2 |
| Table 1S                                     | S3 |
| Table 2S                                     | S4 |
| <sup>1</sup> H NMR spectrum of <b>3</b>      | S5 |
| <sup>1</sup> H NMR spectrum of <b>4</b>      | S5 |
| <sup>1</sup> H NMR spectrum of <b>2</b>      | S6 |
| <sup>1</sup> H NMR spectrum of Zn(CFTPP)     | S6 |
| <sup>1</sup> H NMR spectrum of <b>7</b>      | S7 |
| <sup>1</sup> H NMR spectrum of <b>9</b>      | S7 |

**Synthesis of compound 3.**<sup>1</sup> Cholic acid (1.07 g, 2.62 mmol), DCC (590 mg, 2.86 mmol), and N-hydroxysuccinimide (430 mg, 3.78 mmol) were dissolved in anhydrous THF (50 mL) and CH<sub>3</sub>CN (5 mL). After 8 h at room temperature, the white solid formed was filtered out and the filtrate was concentrated in vacuo to give a white foam (1.19 g, 91% yield). A portion of this solid (350 mg, 0.700 mmol) was dissolved in anhydrous DMF (5 mL). NH<sub>4</sub>OH (42 mg, 27% aqueous solution) was added. After 12 h at 50 °C, the mixture was poured into brine (50 mL). The precipitate was collected by suction filtration, washed with water (2 × 10 mL), and purified with Precipitate was filtered, washed with water (2 x 10 mL), and purified with column chromatography over silica gel using CH<sub>2</sub>Cl<sub>2</sub>/CH<sub>3</sub>OH (8/1) as the eluent to give a white powder (215 mg, 78% yield). <sup>1</sup>H NMR (300 MHz, CDCl<sub>3</sub>, δ): 7.21 (s, 1H), 6.61 (s, 1H), 4.31 (d, 1H, *J* = 4.2 Hz), 4.09 (d, 1H, *J* = 3.6 Hz), 4.00 (d, 1H, *J* = 3.3 Hz), 3.76 (s, 1H), 3.59 (s, 1H), 3.16 (m, 1H), 2.20–0.79 (m, 28H), 0.56 (s, 3H).

**Synthesis of compound 4.**<sup>1</sup> Compound **3** (305 mg, 0.763 mmol) was dissolved in anhydrous THF (20 mL) under N<sub>2</sub>. LiAlH<sub>4</sub> (15.2 mL, 0.5 M in diglyme, 7.60 mmol) was added slowly via a syringe. The reaction mixture was heated to reflux for 12 h. A small amount of ethyl acetate was added slowly and the solvent was concentrated in vacuo. The residue was purified with column chromatography over silica gel using CH<sub>2</sub>Cl<sub>2</sub>/CH<sub>3</sub>OH (10/1) and CH<sub>3</sub>OH/Et<sub>3</sub>N (50/1) as the eluents to give a white solid (168 mg, 56% yield). <sup>1</sup>H NMR (300 MHz, CD<sub>3</sub>OD, δ): 4.30 (d, 1H, *J* = 4.2 Hz), 4.08 (d, 1H, *J* = 3.3 Hz), 3.99 (d, 1H, *J* = 3.0 Hz), 3.59 (s, 1H), 3.38 (s, 1H), 3.15 (m, 2H), 3.05 (m, 1H), 2.21–0.76 (m, 30H), 0.57 (s, 3H).

---

<sup>1</sup> Bellini, A. M.; Quaglio, M. P.; Guarneri, M.; Cavazzini, G. *Eur. J. Med. Chem.* **1983**, *18*, 185–190.

Table 1S. Competitive Epoxidation of *cis*-3-Hexen-1-ol and Cyclohexene by Fe(CFTPP)Cl and Fe(TPP)Cl.<sup>a,b</sup>

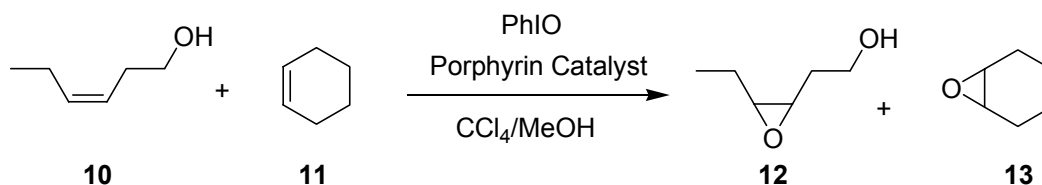

| CCl <sub>4</sub> :MeOH | Fe(CFTPP)Cl                       | Fe(TPP)Cl                         |
|------------------------|-----------------------------------|-----------------------------------|
|                        | Yield (% <b>12</b> /% <b>13</b> ) | Yield (% <b>12</b> /% <b>13</b> ) |
| 90/10                  | 36%/5%                            | 17%/8%                            |
|                        | 38%/7%                            | 17%/9%                            |
|                        | 37%/8%                            | 17%/9%                            |
|                        | Average: <b>37%/7%</b>            | Average: <b>17%/9%</b>            |
| 80/20                  | 22%/5%                            | 15%/15%                           |
|                        | 25%/7%                            | 16%/15%                           |
|                        | 23%/7%                            | 15%/15%                           |
|                        | Average: <b>23%/6%</b>            | Average: <b>15%/15%</b>           |
| 70/30                  | 17%/8%                            | 10%/14%                           |
|                        | 22%/8%                            | 11%/15%                           |
|                        | 20%/8%                            | 10%/15%                           |
|                        | Average: <b>20%/8%</b>            | Average: <b>10%/15%</b>           |
| 60/40                  | 14%/8%                            | 17%/21%                           |
|                        | 15%/11%                           | 15%/22%                           |
|                        | 16%/13%                           | 14%/19%                           |
|                        | Average: <b>15%/11%</b>           | Average: <b>15%/21%</b>           |
| 40/60                  | 8%/10%                            | 7%/17%                            |
|                        | 9%/11%                            | 7%/14%                            |
|                        | 10%/9%                            | 9%/20%                            |
|                        | Average: <b>9%/10%</b>            | Average: <b>8%/17%</b>            |
| 20/80                  | 8%/9%                             | 5%/14%                            |
|                        | 8%/11%                            | 5%/14%                            |
|                        | 9%/13%                            | 6%/17%                            |
|                        | Average: <b>8%/11%</b>            | Average: <b>5%/15%</b>            |

<sup>a</sup> Reactions were carried out at room temperature for 3 hours under N<sub>2</sub>. [Catalyst] = 1 mM. [Catalyst]/[ PhIO] /[**11**]/[**14**]/[**15**] = 0.05/1/5/5/5.

<sup>b</sup> Yields are based on iodosylbenzene and were determined by GC analysis.

Table 2S. Competitive Epoxidation of Cyclohexene Derivatives by Fe(CFTPP)Cl and Fe(TPP)Cl.<sup>a,b</sup>

| <b>11</b>              | <b>14</b> | <b>15</b> | <b>13</b>                                      | <b>16</b> | <b>17</b>                                      |
|------------------------|-----------|-----------|------------------------------------------------|-----------|------------------------------------------------|
| CCl <sub>4</sub> :MeOH |           |           | Fe(CFTPP)Cl                                    |           | Fe(TPP)Cl                                      |
|                        |           |           | Yield (% <b>13</b> /% <b>16</b> /% <b>17</b> ) |           | Yield (% <b>13</b> /% <b>16</b> /% <b>17</b> ) |
| 90/10                  |           |           | 1%/14%/7%                                      |           | 8%/9%/3%                                       |
|                        |           |           | 3%/15%/8%                                      |           | 9%/9%/4%                                       |
|                        |           |           | 3%/16%/9%                                      |           | 10%/10%/4%                                     |
|                        |           |           | Average: <b>2%/15%/8%</b>                      |           | Average: <b>9%/9%/4%</b>                       |
| 80/20                  |           |           | 3%/13%/6%                                      |           | 9%/8%/4%                                       |
|                        |           |           | 4%/15%/7%                                      |           | 9%/8%/4%                                       |
|                        |           |           | 4%/13%/7%                                      |           | 8%/10%/6%                                      |
|                        |           |           | Average: <b>4%/14%/7%</b>                      |           | Average: <b>9%/9%/5%</b>                       |
| 60/40                  |           |           | 4%/14%/5%                                      |           | 8%/6%/2%                                       |
|                        |           |           | 5%/13%/5%                                      |           | 9%/6%/3%                                       |
|                        |           |           | 5%/15%/6%                                      |           | 7%/8%/3%                                       |
|                        |           |           | Average: <b>5%/14%/5%</b>                      |           | Average: <b>8%/7%/3%</b>                       |
| 20/80                  |           |           | 6%/12%/4%                                      |           | 7%/7%/3%                                       |
|                        |           |           | 7%/13%/3%                                      |           | 6%/6%/3%                                       |
|                        |           |           | 9%/14%/4%                                      |           | 4%/6%/4%                                       |
|                        |           |           | Average: <b>7%/13%/4%</b>                      |           | Average: <b>6%/6%/3%</b>                       |

<sup>a</sup> Reactions were carried out at room temperature for 3 hours under N<sub>2</sub>. [Catalyst] = 1 mM. [Catalyst]/[PhIO]/[**11**]/[**14**]/[**15**] = 0.05/1/5/5/5.

<sup>b</sup> Yields are based on iodosylbenzene and were determined by GC analysis.

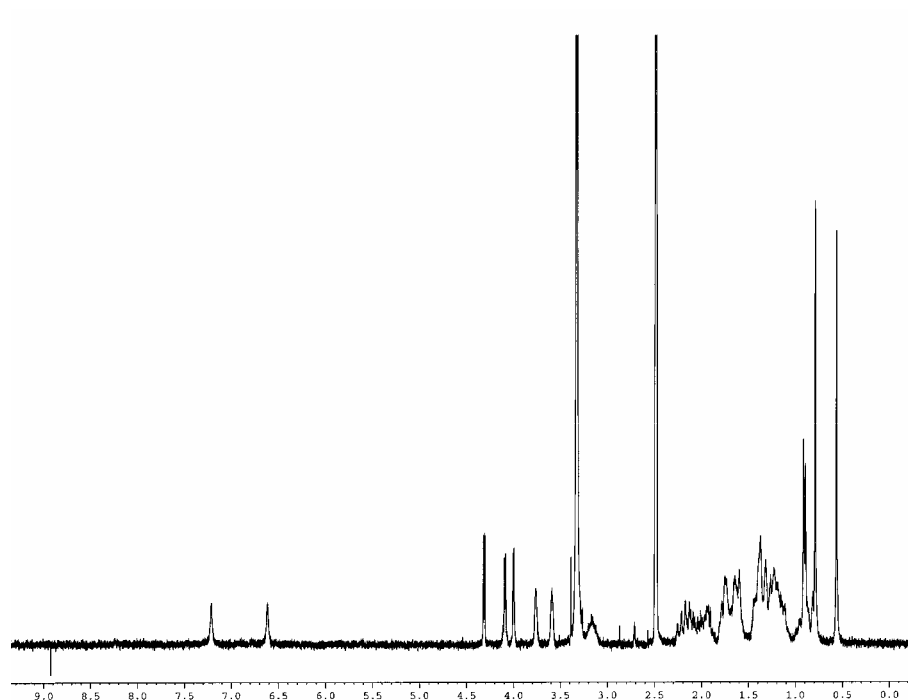

**Figure 1S.**  $^1\text{H}$  NMR spectrum (400 MHz) of **3** in  $\text{DMSO-d}_6$ .

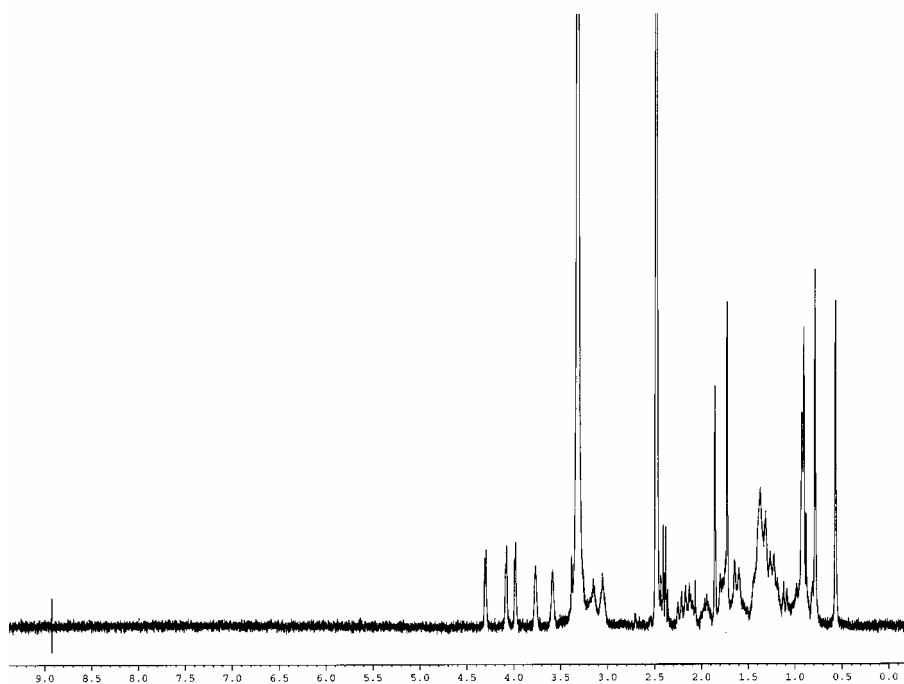

**Figure 2S.**  $^1\text{H}$  NMR spectrum (400 MHz) of **4** in  $\text{DMSO-d}_6$ .

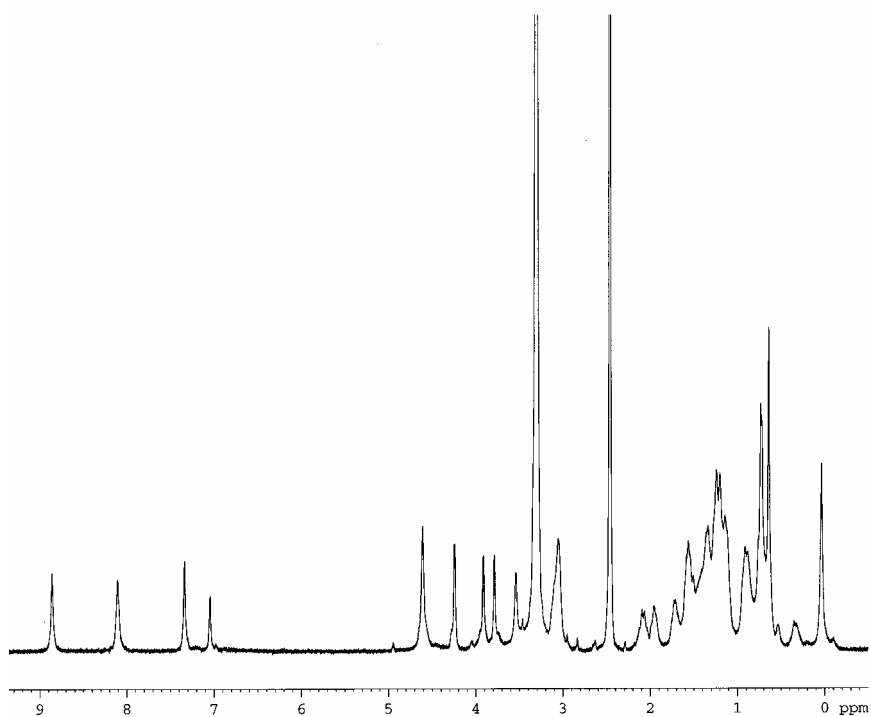

**Figure 3S.**  $^1\text{H}$  NMR spectrum (400 MHz) of **2** in  $\text{DMSO-d}_6$ .

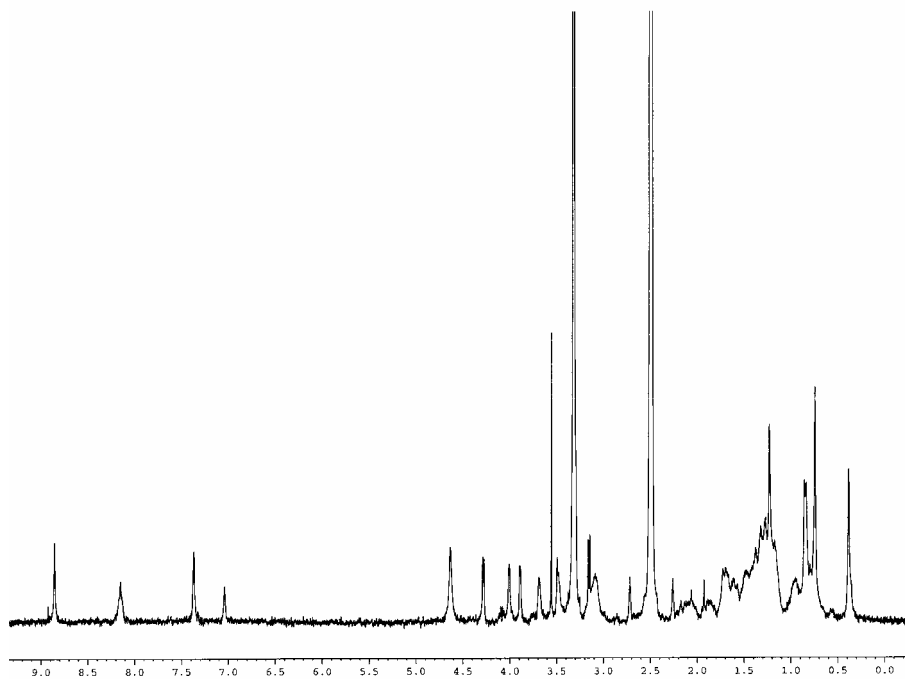

**Figure 4S.**  $^1\text{H}$  NMR spectrum (400 MHz) of  $\text{Zn(CFTPP)}$  in  $\text{DMSO-d}_6$ .

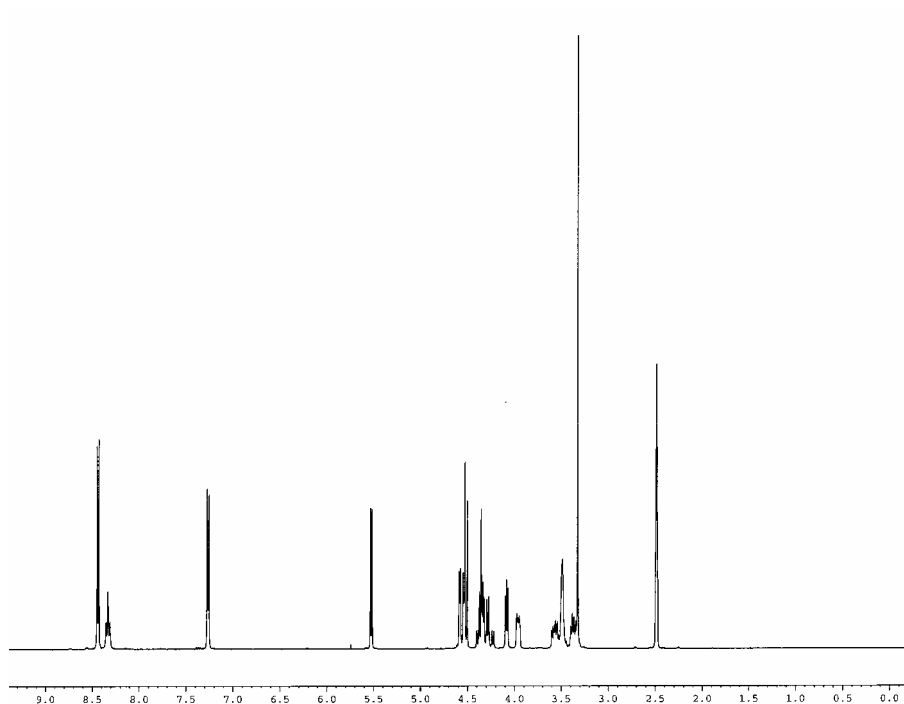

**Figure 5S.**  $^1\text{H}$  NMR spectrum (400 MHz) of **7** in  $\text{DMSO-d}_6$ .

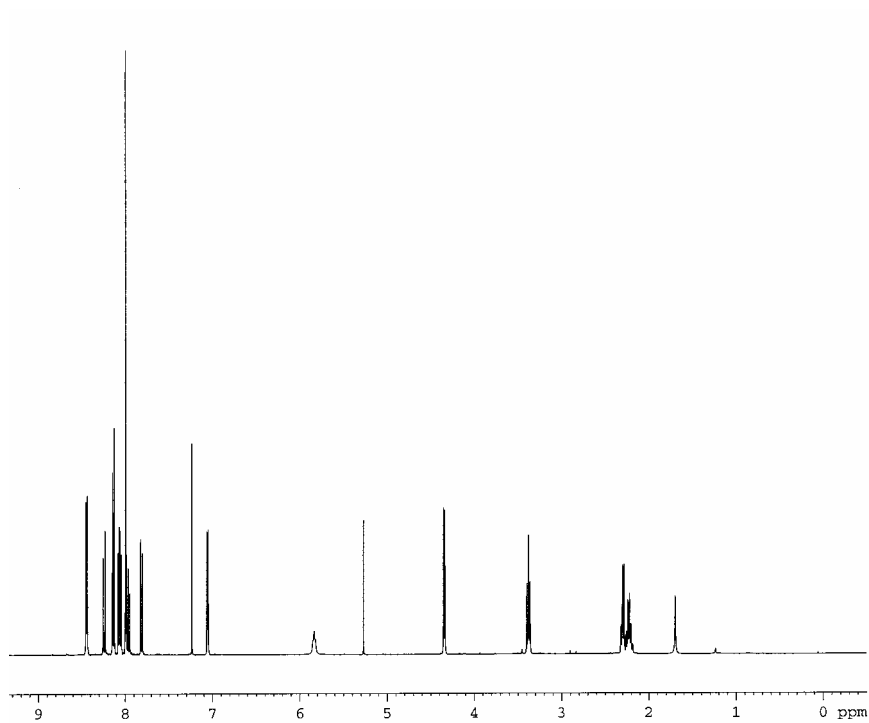

**Figure 6S.**  $^1\text{H}$  NMR spectrum (400 MHz) of **9** in  $\text{CDCl}_3$ .
